# Supplementary material for: Constraint-Based, Score-Based and Hybrid Algorithms to Construct Bayesian Gene Networks in the Bovine Transcriptome
Source: MDPI journal article supplement (doi:10.3390/ani12101305), 2022-05-19
Supplement: s1 [file s1]

# **Constraint-Based, Score-Based and Hybrid Algorithms to Construct Bayesian Gene Networks in the Bovine Transcriptome**

**Supplementary Table S1:** A literature review on bovine transcriptomic modeling using other methodologies

| Study                                             | Tissue                 | Trait                                                                              | Model                           |      | Data           | Results                                                                                                                                                     |
|---------------------------------------------------|------------------------|------------------------------------------------------------------------------------|---------------------------------|------|----------------|-------------------------------------------------------------------------------------------------------------------------------------------------------------|
| Wilkinson et al. 2012                             | Peripheral blood cells | Disease susceptibility                                                             | LIMMA, DAVID                    | IPA, | DNA microarray | IL7R, JUN, TNFRSF90, and ZAP70                                                                                                                              |
| Ghaderi-Zefrehei et al. 2015                      | Immune system          | Immune system                                                                      | SMILE, GeNIe                    |      | RT-PCR         | GM-CSF, IL-2, IFN- $\gamma$ , IL-6, IL-8, and TNF- $\alpha$                                                                                                 |
| Fortes et al. 2012                                | Hypothalamus           | Body weight, hip height, average daily gain, back fat thickness, intramuscular fat | GWAS associated weighted matrix |      | GWAS           | 978 Genes, 1,555 important SNP, TF'S (ZMAT3, STAT6, RFX4, PLAGL1, and NR6A1)                                                                                |
| Moran et al. 2017 (Ghaderi-Zefrehei et al., 2015) | Endometrium            | Fertility                                                                          | Gephi                           |      | RNA Seq        | 123 genes from three physiologically relevant networks (1) actin and cytoskeletal components; (2) immune function; and (3) ion transportation, 403 DE genes |
| Ramayo-Caldas et al. 2014 (Gray et al., 2006)     | Intramuscular fat      | Intramuscular fat                                                                  | Associated weight matrix        |      | SNP            | Three TF (HNF4G, PARAGC1A, FOXP3); Genes (CAPN6, STC2, MAP2K4, EYA1, COPS5, XKR4, NR2E1, TOX, ATF1, ASPH, TGS1, and TTPA)                                   |
| Alexandre et al. 2015                             | Liver                  | Feed efficiency                                                                    | (WGCNA) package                 | R-   | RNA-Seq        | Genes (SOD3, FASN, GADD45G, CYP2E1, ENSBTAG00000038430, mir-2904-3, RHOB, NR0B2) 8 DE, 34 Module, 463 differentially co-expressed genes, 8 key regulators   |

|                       |                                                     |                 |                                                                                                                           |               |                                                                                            |
|-----------------------|-----------------------------------------------------|-----------------|---------------------------------------------------------------------------------------------------------------------------|---------------|--------------------------------------------------------------------------------------------|
| Cánovas et al. 2014   | Hypothalamus, pituitary, endometrium, ovary, uterus | Puberty         | Partial correlation and information theory (PCIT) algorithms                                                              | GWAS, RNA-Seq | 5 TF's (PROP1, DACH2, FOXA1, PITX2, SIX6)                                                  |
| Gonçalves et al. 2018 | Skeletal muscle                                     | Beef tenderness | Partial correlation with information theory (PCIT), phenotypic impact factor (PIF) and the regulatory impact factor (RIF) | RNA-Seq       | Genes (USP2, GBR10, ANO1, TMBIM4, MB, ENO3, CA3); MicroRNA (bta-mir-133a-2 and bta-mir-22) |
| Neupane et al., 2017  | Endometrium                                         | Pregnancy       | GWAS                                                                                                                      | SNP           | TNF, TP53, SOX2, and OCT4                                                                  |

Abbreviations: LIMMA: Linear Models for Microarray Data ; IPA: Ingenuity Pathway Analysis; DAVID: Database for Annotation, Visualization and Integrated Discovery IL7R: ; JUN: ; TNFRSF90: ; ZAP70: ; SMILE: ; RT-PCR: ; GM-CSF: ; IL-2: interleukin-2; IFN- $\gamma$ : interferon  $\gamma$ ; TNF- $\alpha$ : tumor necrosis factor  $\alpha$ ; GWAS: ; SNP: single nucleotide polymorphism; Transferrin (TF): ; Zinc Finger Matrin-Type 3 (ZMAT3): ; Signal Transducer And Activator Of Transcription 6 (STAT6): ; Regulatory Factor X4 (RFX4): ; PLAG1 Like Zinc Finger 1 (PLAGL1): ; Nuclear Receptor Subfamily 6 Group A Member 1 (NR6A1): ; DE: differentially expressed?; Hepatocyte Nuclear Factor 4 Gamma (HNF4G): ; PPARG coactivator 1 alpha (PARAGC1A): ; Forkhead Box P3 (FOXP3): ; Calpain 6 (CAPN6): ; Stanniocalcin 2 (STC2): ; Mitogen-Activated Protein Kinase Kinase 4 (MAP2K4): ; EYA Transcriptional Coactivator And Phosphatase 1 (EYA1): ; COP9 Signalosome Subunit 5 (COPS5): ; XK Related 4 (XKR4): ; Nuclear Receptor Subfamily 2 Group E Member 1 (NR2E1): ; Thymocyte Selection Associated High Mobility Group Box (TOX): ; Activating Transcription Factor 1 (ATF1): ; Aspartate Beta-Hydroxylase (ASPH): ; Trimethylguanosine Synthase 1 (TGS1): ; Alpha Tocopherol Transfer Protein (TTPA): ; Superoxide Dismutase 3 (SOD3): ; Fatty Acid Synthase (FASN): ; Growth Arrest And DNA Damage Inducible Gamma (GADD45G): ; Cytochrome P450 Family 2 Subfamily E Member 1 (CYP2E1): ;

Ras Homolog Family Member B (RHOB): ; Nuclear Receptor Subfamily 0 Group B Member 2 (NR0B2): ; PROP Paired-Like Homeobox 1 (PROP1): ; Dachshund Family Transcription Factor 2 (DACH2): ; Forkhead Box A1 (FOXA1):; Paired Like Homeodomain 2 (PITX2): ; SIX Homeobox 6 (SIX6): ; Ubiquitin Specific Peptidase 2 (USP2): ; Growth Factor Receptor-Bound Protein 10 (GBR10): ; Anoctamin 1 (ANO1): ; Transmembrane BAX Inhibitor Motif Containing 4 (TMBIM4): ; Myoglobin (MB): ; Enolase 3 (ENO3): ; Carbonic Anhydrase 3 (CA3): ; Tumor Necrosis Factor (TNF): ; Tumor Protein P53 (TP53): ; SRY-Box Transcription Factor 2 (SOX2): ; Octamer-Binding Transcription Factor 4 (OCT4).

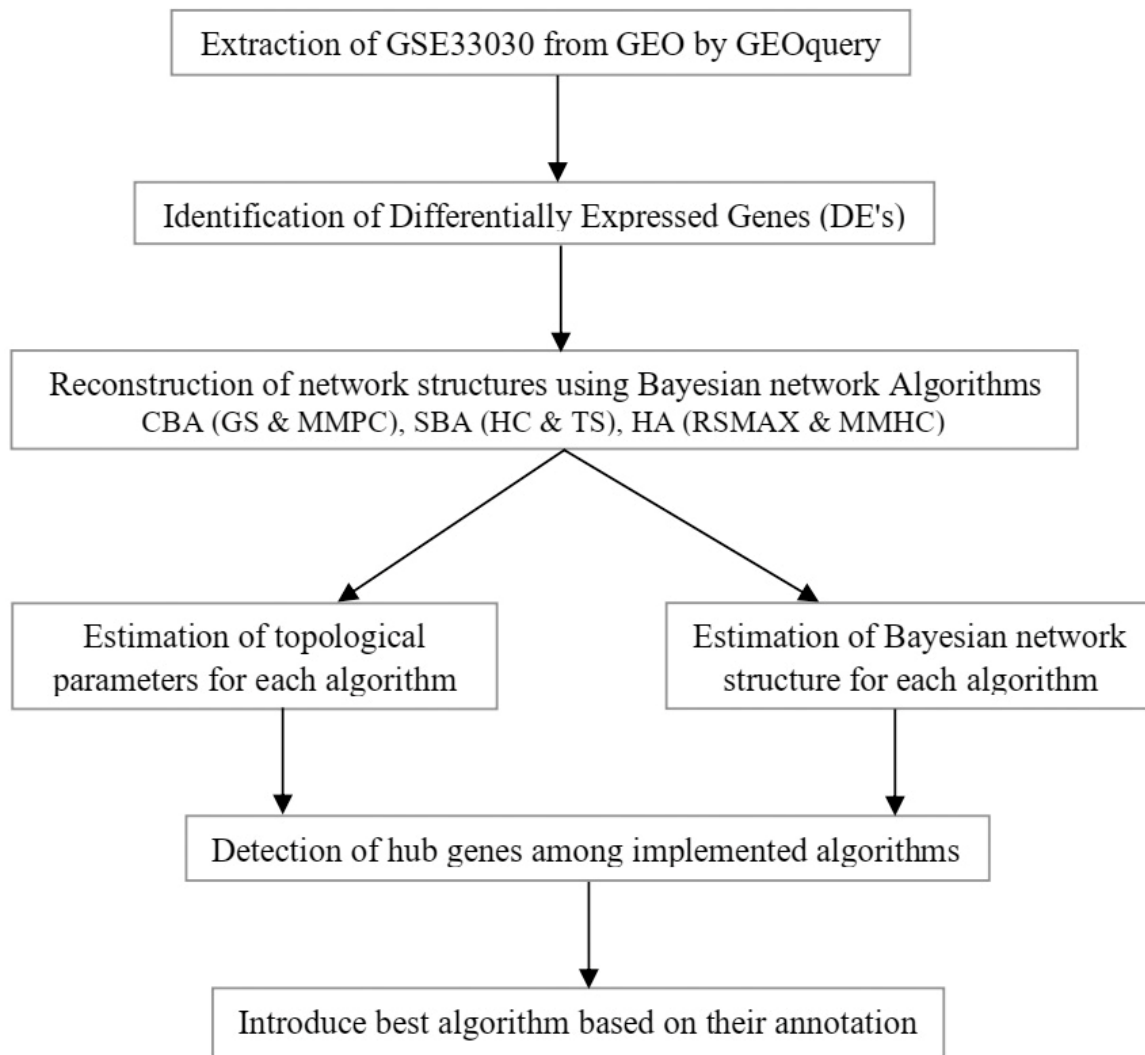

**Supplementary Figure S1:** Flow diagram of the proposed method. GEO - gene expression omnibus; CBA - constraint-based algorithms; SBA - score-based algorithms; HA - hybrid algorithms; GS - grow shrink; MMPC - Max-Min parent children; HC - hill climbing; TS - Tabu search; MMHC - Max-Min hill climbing; RSMAX - restricted maximum.

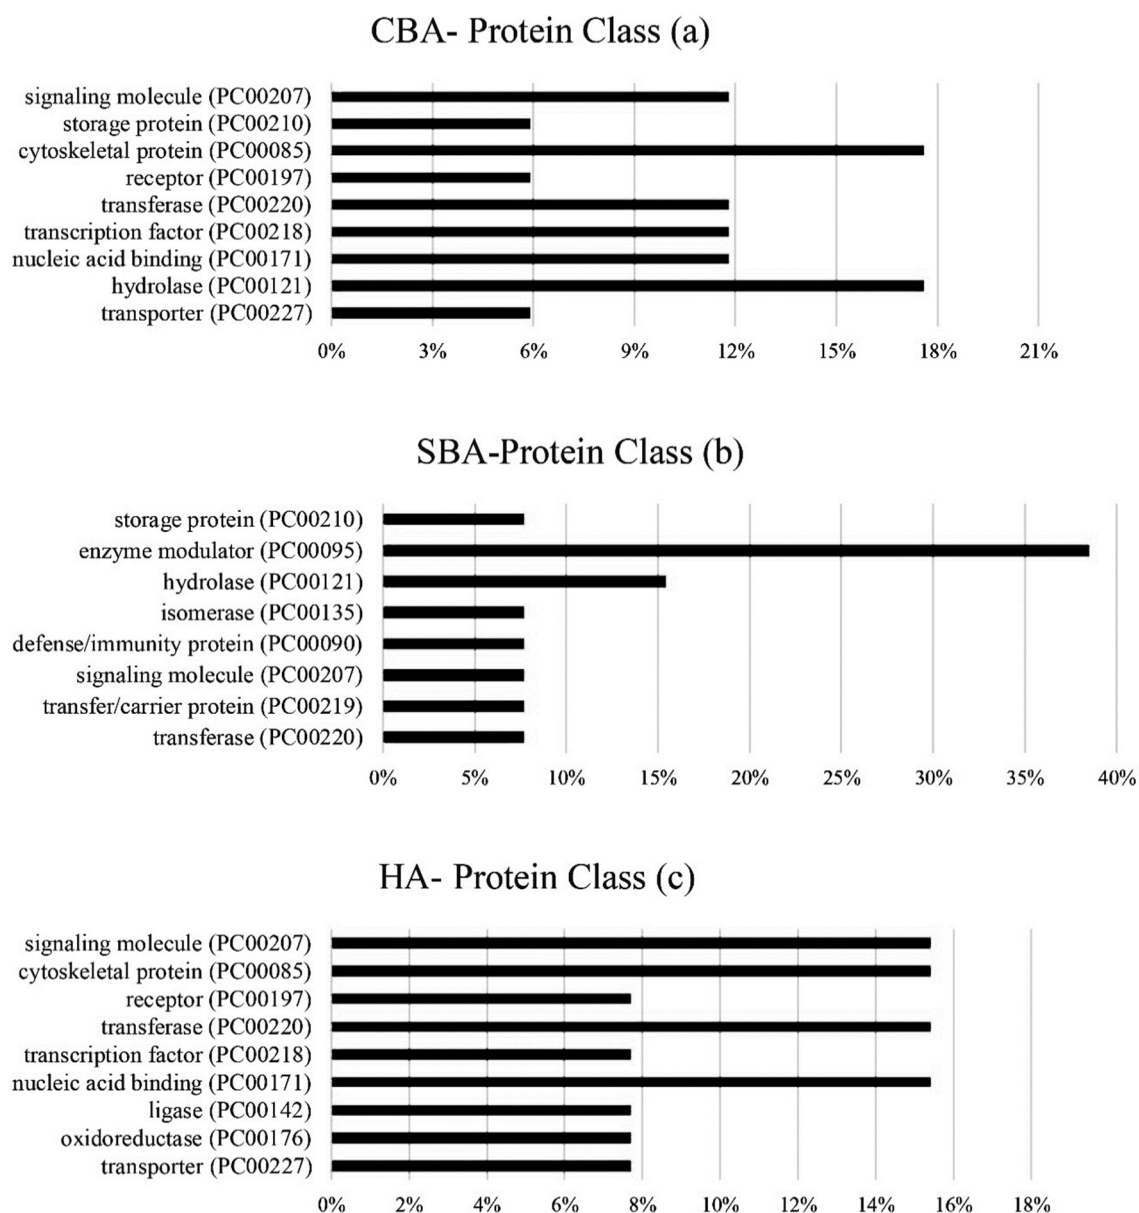

**Supplementary Figure S2:** Protein class of identified hub genes from (a) CBA, (b) SBA and (c) HA algorithms. CBA - constraint-based algorithms; SBA - score-based algorithms; HA - hybrid algorithms.
